# Supplementary material
Source: PubMed Central journal article supplement (PMC3387327)
Supplement: NIHMS346246-supplement-01.pdf [file NIHMS346246-supplement-01.pdf]

**Supplemental Table 1:** ICD-9 codes used to assess eligibility, baseline characteristics and outcomes\*

| <b>Diagnosis</b>                                                                                                           | <b>ICD9.CM</b>           |
|----------------------------------------------------------------------------------------------------------------------------|--------------------------|
| Diabetes                                                                                                                   | 250                      |
| Hypertension                                                                                                               | 401-405                  |
| Hypercholesterolemia                                                                                                       | 272.0-272.4              |
| Angina                                                                                                                     | 411.1, 413               |
| Myocardial infarction                                                                                                      | 410, 412                 |
| Death                                                                                                                      | 798                      |
| Stroke                                                                                                                     | 430-438                  |
| Pulmonary embolism                                                                                                         | 415.1                    |
| Deep venous thrombosis                                                                                                     | 453                      |
| Breast cancer                                                                                                              | 174, 239.2               |
| Colon cancer                                                                                                               | 153                      |
| Endometrial cancer                                                                                                         | 182                      |
| All cancers                                                                                                                | 140-208                  |
| Hip and vertebral fractures                                                                                                | 805, 806, 808            |
| All fractures                                                                                                              | 733.1, 805, 806, 808-829 |
| Smoking                                                                                                                    | 305.1                    |
| Overweight/obesity                                                                                                         | 278.0                    |
| *Codes for medications, imaging and other procedures are specific to Taiwan national health insurance and are not included |                          |

**Supplemental Table 2:** Ineligible subjects

| <b>Exclusion criteria</b>                                                              | <b>MHT exposure<br/>(n=16,572)<br/>N (%)</b> | <b>No MHT exposure<br/>(n=83,579)<br/>N (%)</b> |
|----------------------------------------------------------------------------------------|----------------------------------------------|-------------------------------------------------|
| Medical condition associated with predicted survival < 3 years (CHF, COPD, ESRD, AIDS) | 265 (1.6)                                    | 333 (0.4)                                       |
| Prior cancer                                                                           | 103 (0.6)                                    | 158 (0.2)                                       |
| Endometrial hyperplasia                                                                | 35 (0.2)                                     | 18 (0.02)                                       |
| Alcoholism/drug dependency                                                             | 4 (0.02)                                     | 1 (0.001)                                       |
| Dementia, mental illness                                                               | 183 (1.1)                                    | 215 (0.3)                                       |
| Acute MI, CVA, TIA within 6 months                                                     | 210 (1.3)                                    | 300 (0.3)                                       |
| Severe hypertension                                                                    | 81 (0.5)                                     | 83 (0.1)                                        |
| Chronic hepatitis or cirrhosis                                                         | 159 (0.9)                                    | 188 (0.2)                                       |
| Prior PE or DVT                                                                        | 2 (0.01)                                     | 10 (0.01)                                       |
| Blood-related disorders                                                                | 1 (0.006)                                    | 4 (0.004)                                       |
| Other*                                                                                 | 107 (0.6)                                    | 91 (0.1)                                        |
| Total number of excluded subjects                                                      | 1150 (6.9)                                   | 1401 (1.7)                                      |

\*Other includes OCP use
